# Supplementary material for: Gamma entrainment induced by deep brain stimulation as a biomarker for motor improvement with neuromodulation
Source: Springer Nature journal article supplement (doi:10.1038/s41467-025-58132-7), 2025-03-26
Supplement: MOESM1 [file 41467_2025_58132_MOESM1_ESM.pdf]

# SUPPLEMENTARY MATERIAL

## (A) Group With FTG DBS-Off (STNs #1 - #8)

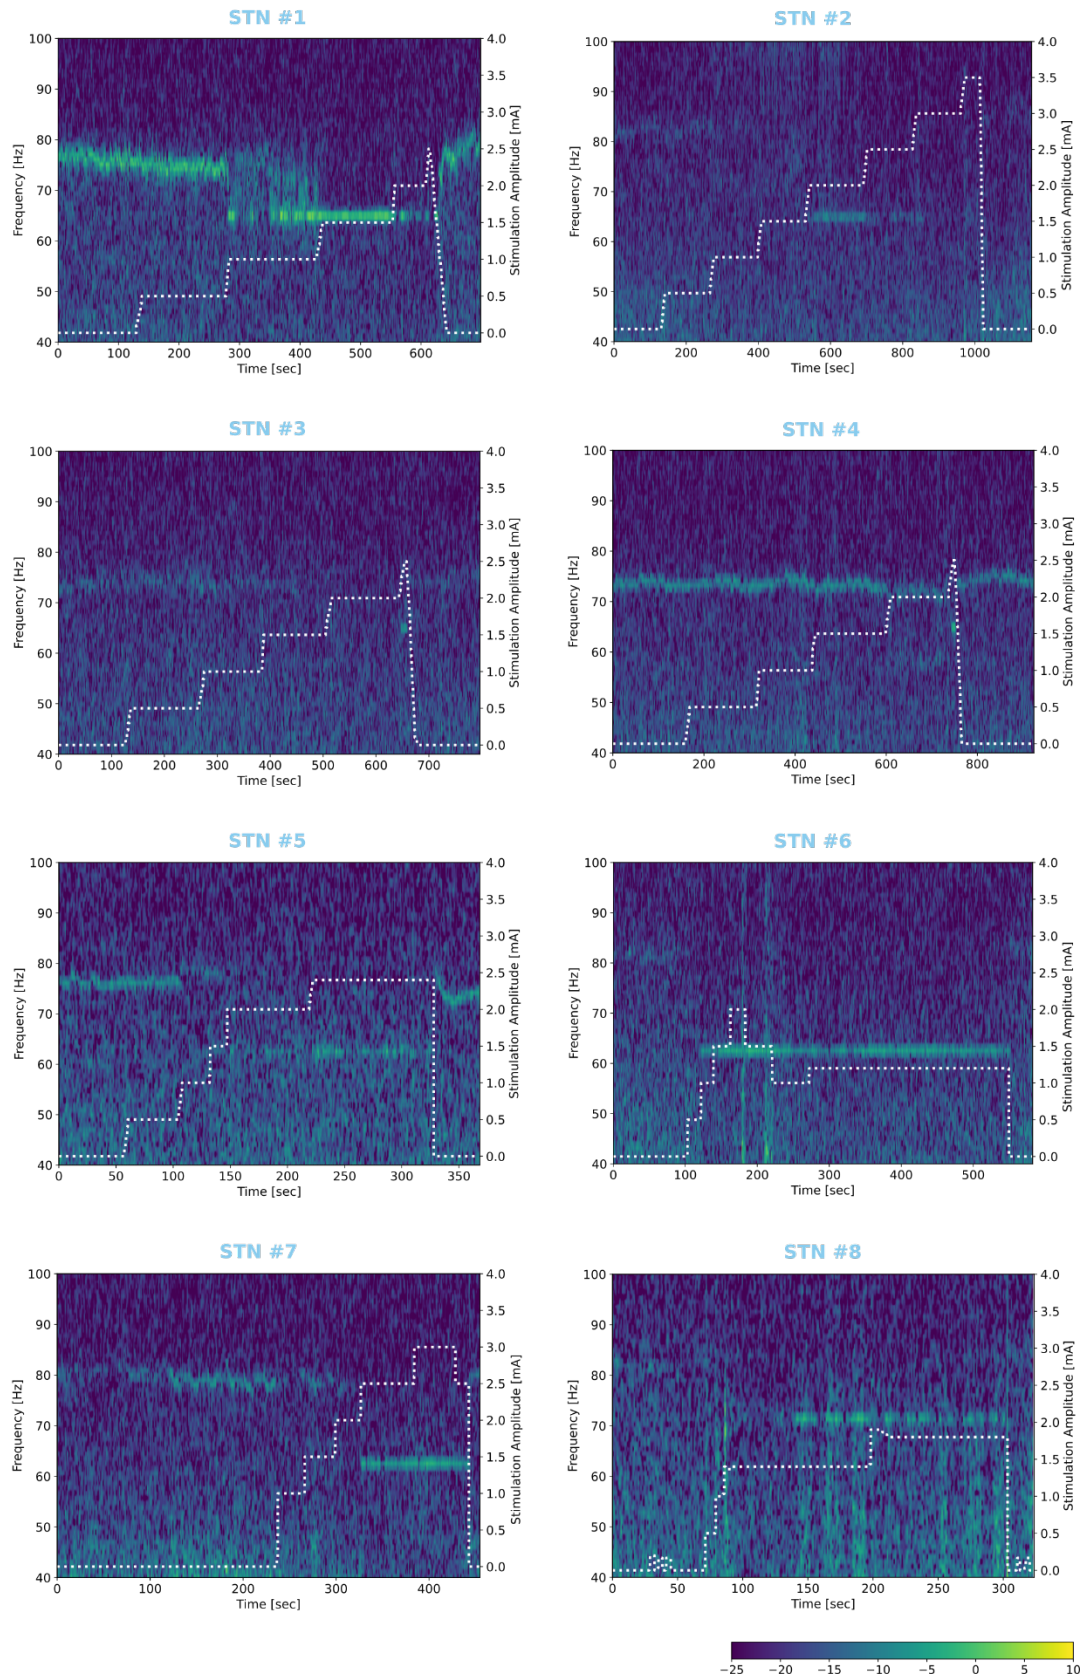

(B) Group Without FTG DBS-Off (STNs #9 - #15)

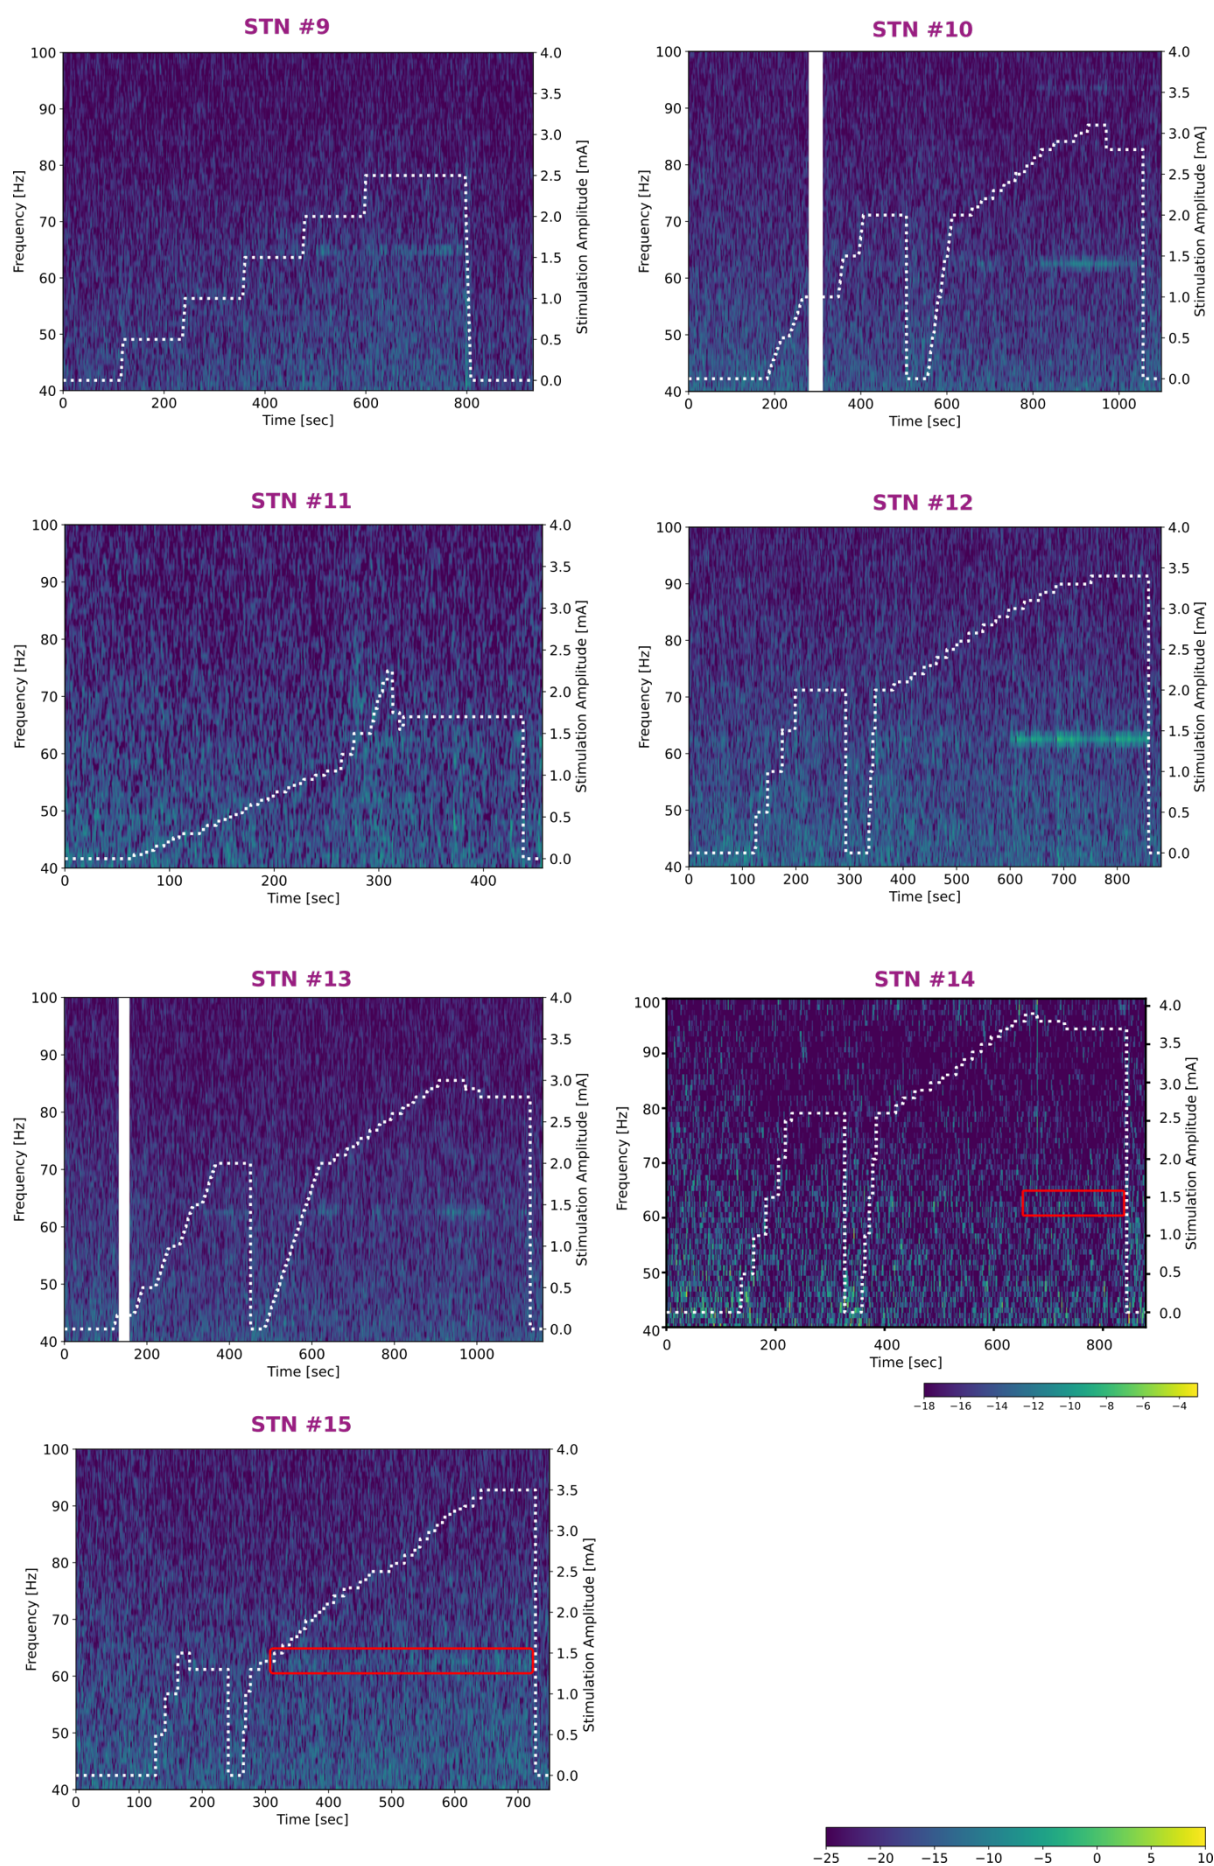



(C) Group with no Gamma Activity (STNs #16 - #19)

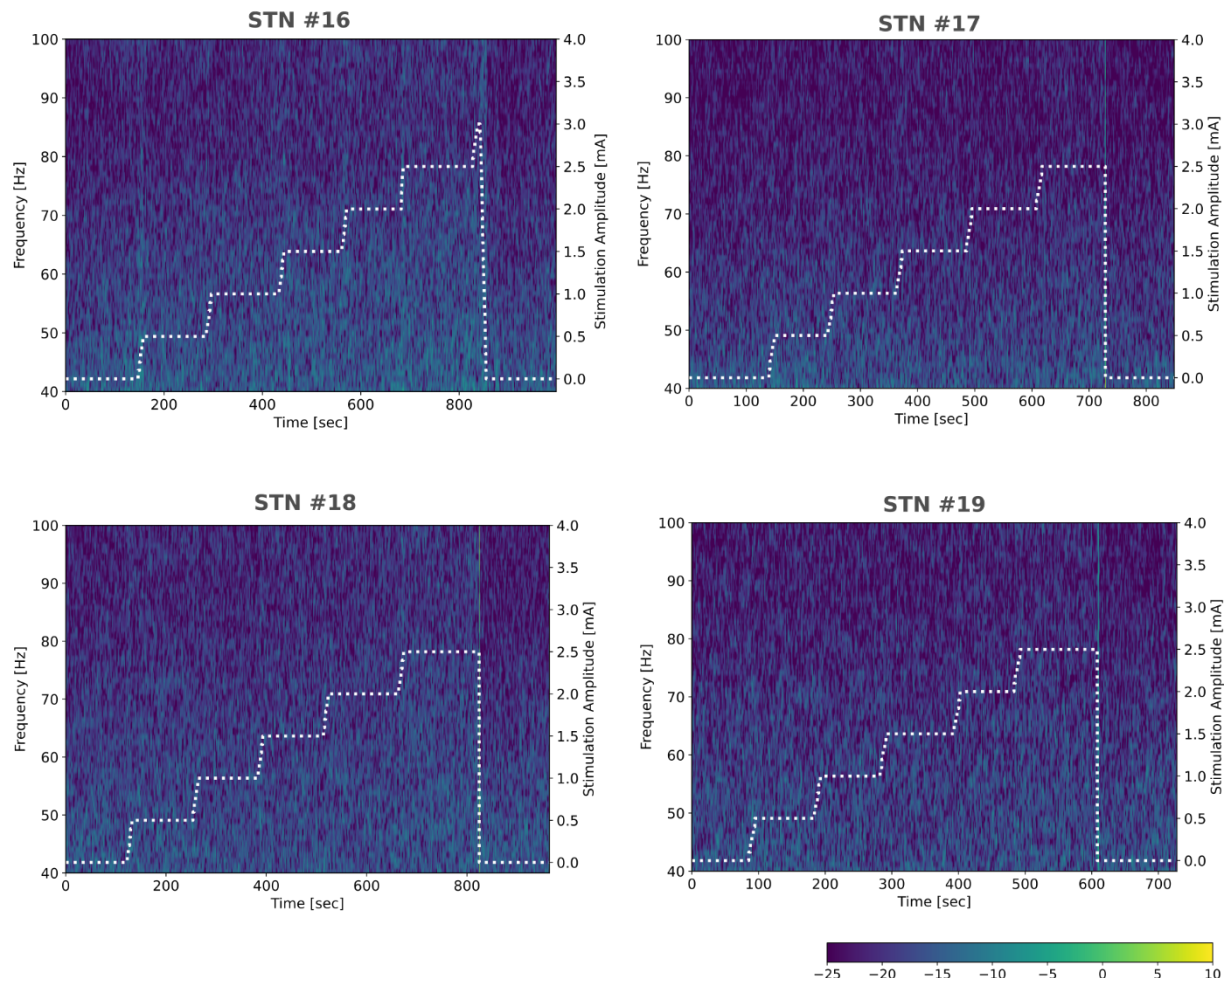

**Supplementary Figure 1. Individual spectrograms of all STNs.** (A) STNs with spontaneous FTG during DBS-off. (B) STNs without spontaneous FTG during DBS-off. Note that figure of the STN #14 has a different color scale. (C) STNs without gamma activity detected on/off DBS.
